# Supplementary material for: Concussion-related visual memory and reaction time impairment in college athletes improved after osteopathic manipulative medicine: a randomized clinical trial
Source: publisher site journal article supplement (doi:10.1515/jom-2022-0085), 2022-09-29
Supplement: Supplementary file 1 [file j_jom-2022-0085_suppl_001.docx]

Supplemental Table 1. Osteopathic structural exam and OMM.

| Osteopathic Structural Physical Exam | Osteopathic Manual Treatment & Targets | Goal for preventing secondary phase injury and healing |
| --- | --- | --- |
| **Concussion** | Acute & severe somatic dysfunctions |  |
| Cranial –  Occipitoatlantal joint, Compressed sutures, SBS strain patterns, Cranial Rhythmic Impulse (Traube-Hering oscillation of blood flow velocity) | Occipital-atlantal decompression,  Mastoid-occipital suture V-Spread,  Dural venous sinus drainage,  BMT for cranial strain patterns,  Cranial lifts & decompressions,  CV4 (compression 4th ventricle) | Glymphatic drainage, restore autonomic nervous system balance, decompress connective tissues, mechanically stimulate periventricular stem cells |
| Spine –  Somatic dysfunctions | BLT, MET, FPR, ART, HVLA, and/or counterstrain | Restore circulation, ventilation, and autonomic nervous system balance |
| Rib Cage:  Thoracic outlet,  Rib dysfunctions,  Sternal & clavicular dysfunction,  Thoracic diaphragm | Thoracic outlet release,  Rib raising,  BLT, MET, FPR, ART, HVLA, and/or counterstrain - for any other somatic dysfunctions | Restore circulation, ventilation, and autonomic nervous system balance |
| Sacrum/Pelvis – somatic dysfunctions | Address dysfunction with appropriate standard OMM. | Restore circulation, ventilation, autonomic nervous system balance, and long axial vestibular reflex responses |
